# Supplementary material for: Rehabilitation and outcomes after complicated vs uncomplicated mild TBI: results from the CENTER-TBI study
Source: Springer Nature journal article supplement (doi:10.1186/s12913-022-08908-0), 2022-12-16
Supplement: MOESM4 [file 23836902]

## Additional file 4 - Sites, ethical committees, and ethical approval

| Country     | City        | Institute                                                                                   | Ethical Committee                                                                                                                                                                | Number Approval                                          | Date Approval                |
|-------------|-------------|---------------------------------------------------------------------------------------------|----------------------------------------------------------------------------------------------------------------------------------------------------------------------------------|----------------------------------------------------------|------------------------------|
| Austria     | Vienna      | Medizinische Universität Wien<br>Universitätsklinik für Unfallchirurgie                     | Ethikkommission der Medizinischen Universität Wien                                                                                                                               | 1646/2014                                                | 3/05/2016                    |
| Austria     | Innsbruck   | Medizinische Universität Innsbruck<br>Universitätsklinik für Neurologie                     | Ethikkommission der Medizinischen Universität Innsbruck                                                                                                                          | AN2014-0336 343/4.22                                     | 1/12/2014                    |
| Belgium     | Antwerp     | Antwerp University Hospital                                                                 | Centraal Ethisch Comité - Ethisch Comité Universitair Ziekenhuis Antwerpen en de Universiteit Antwerpen                                                                          | B300201422714                                            | 17/11/2014                   |
| Belgium     | Liège       | CHR Citadelle                                                                               | - Centraal Ethisch Comité - Ethisch Comité Universitair Ziekenhuis Antwerpen en de Universiteit Antwerpen<br>- Comité d'Ethique 412                                              | - B300201422714<br>- 1427                                | - 17/11/2014<br>- 25/11/2014 |
| Belgium     | Liège       | CHU                                                                                         | - Centraal Ethisch Comité - Ethisch Comité Universitair Ziekenhuis Antwerpen en de Universiteit Antwerpen<br>- Comité d'Ethique hospitalo-facultaire niversitaire de Liège (707) | - B300201422714<br>- B707201422102 / 2014-244            | - 17/11/2014<br>- 07/10/2014 |
| Belgium     | Leuven      | UZ Leuven                                                                                   | - Centraal Ethisch Comité - Ethisch Comité Universitair Ziekenhuis Antwerpen en de Universiteit Antwerpen<br>- Commissie Medische Ethiek UZ KU Leuven / Onderzoek                | - B300201422714<br>- B322201523981 / S57019<br>(ML11365) | - 06/13/2015<br>- 07/10/2014 |
| Denmark     | Odense      | Odense Universitetshospital - Neurokirurgisk afdeling                                       | De Videnskabetiske Komitéer for Region Syddanmark                                                                                                                                | S-20140215                                               | 16/03/2015                   |
| Denmark     | Copenhagen  | Region Hovedstaden Rigshospitalet                                                           | De Videnskabetiske Komitéer for Region Syddanmark                                                                                                                                | S-20140215                                               | 16/03/2015                   |
| Finland     | Turku       | Turku University Hospital                                                                   | Varsinais suomen sairaanhoitopiirin kuntayhtymä - Eettinen Toimikunta                                                                                                            | 95/1801/2014                                             | 24/10/2014                   |
| Finland     | Helsinki    | Helsinki University Central Hospital                                                        | Varsinais suomen sairaanhoitopiirin kuntayhtymä - Eettinen Toimikunta                                                                                                            | 95/1801/2014                                             | 24/10/2014                   |
| France      | Paris       | APHP                                                                                        | Agence Nationale de Sécurité du Médicament et des Produits de Santé ANSM                                                                                                         | 1414218-31                                               | 19/12/2014                   |
| France      | Besançon    | CHRU de Besançon                                                                            | Agence Nationale de Sécurité du Médicament et des Produits de Santé ANSM                                                                                                         | 1414218-31                                               | 19/12/2014                   |
| France      | Lille       | Lille University Hospital                                                                   | Agence Nationale de Sécurité du Médicament et des Produits de Santé ANSM                                                                                                         | 1414218-31                                               | 19/12/2014                   |
| France      | Grenoble    | University Hospital of Grenoble                                                             | Agence Nationale de Sécurité du Médicament et des Produits de Santé ANSM                                                                                                         | 1414218-31                                               | 19/12/2014                   |
| France      | Nancy       | University Hospital Nancy                                                                   | Agence Nationale de Sécurité du Médicament et des Produits de Santé ANSM                                                                                                         | 1414218-31                                               | 19/12/2014                   |
| France      | Poitiers    | CHU Poitiers                                                                                | Agence Nationale de Sécurité du Médicament et des Produits de Santé ANSM                                                                                                         | 1414218-31                                               | 19/12/2014                   |
| Germany     | Heidelberg  | Universitätsklinikum Heidelberg<br>Neurochirurgische Klinik                                 | Ethikkommission Medizinische Fakultät Heidelberg                                                                                                                                 | S-435/2014                                               | 27/05/2015                   |
| Germany     | Berlin      | Charité   Campus Virchow Klinikum                                                           | Ethikkommission an der Medizinische Fakultät<br>Der rheinisch-Westfälischen Technischen Hochschule Aachen                                                                        | 1098/15                                                  | 26/02/2016                   |
| Germany     | Aachen      | Uniklinik RWTH Aachen                                                                       | Ethikkommission an der Medizinische Fakultät<br>Der rheinisch-Westfälischen Technischen Hochschule Aachen                                                                        | EK 174/15                                                | 2/07/2015                    |
| Germany     | Ludwigsburg | Klinikum Ludwigsburg                                                                        | Ethikkommission Medizinische Fakultät Heidelberg                                                                                                                                 | S-435/2014                                               | 29/01/2016                   |
| Hungary     | Pecs        | Pécsi Tudományegyetem Klinikai Központ                                                      | - ETT TUKEB Egészségügyi Tudományos Tanács<br>- Pécsi Tudományegyetem                                                                                                            | - 42558-3/2014/EKU<br>- 5421                             | - 2/10/2014<br>- 28/03/2015  |
| Hungary     | Szeged      | szegedi tudományegyetem orvostudományi kar<br>Szent Györgyi Albert Klinikai Központ         | - ETT TUKEB Egészségügyi Tudományos Tanács<br>- Szegedi Tudományegyetem                                                                                                          | - 42558-3/2014/EKU<br>- 3803                             | - 2/10/2014<br>- 23/05/2016  |
| Israel      | Haifa       | Rambam Medical Center                                                                       | Helsinki Committee, Rambam Health Care Campus                                                                                                                                    | RMB 373-14                                               | 22/07/2015                   |
| Israel      | Jeruzalem   | Hadassah-hebrew University Medical Center                                                   | Hadassah Medical Organization IRB                                                                                                                                                | 0590-16 HMO                                              | 6/12/2016                    |
| Italy       | Milan       | Fondazione IRCCS Ca' Granda Ospedale Maggiore Policlinico                                   | Fondazione IRCCS Ca' Granda Ospedale Maggiore Policlinico - Direzione Scientifica Comitato Etico                                                                                 | 542/2014                                                 | 20/10/2014                   |
| Italy       | Milan       | Ospedale San Raffaele                                                                       | Comitato Etico - Ospedale San Raffaele                                                                                                                                           | 217/2014                                                 | 10/04/2015                   |
| Italy       | Torino      | AOU Città della Salute e della Scienza di Torino                                            | Comitato Etico Interaziendale A.O.U. Città della Salute e della Scienza di Torino - A.O. Ordine Mauriziano - A.S.L.                                                              | 0015269                                                  | 15/02/2016                   |
| Italy       | Cesena      | Bufofani Hospital                                                                           | Comitato Etico IRST IRCCS AVR                                                                                                                                                    | 1675/2015 I.5/207                                        | 18/03/2015                   |
| Italy       | Padova      | Azienda Ospedaliera Università di Padova                                                    | Comitato Etico - Ospedale San Raffaele                                                                                                                                           | 217/2014                                                 | 10/04/2015                   |
| Italy       | Monza       | San Gerardo Hospital/ASST                                                                   | Comitato Etico Della Provincia Monza Brianza                                                                                                                                     | 1978/2014                                                | 22/12/2014                   |
| Italy       | Novara      | Maggiore Della Carità Hospital                                                              | Comitato Etico Interaziendale A.O.U. 'Maggiore della Carità'                                                                                                                     | CE 46/15                                                 | 3/07/2015                    |
| Italy       | Milan       | Niguarda Hospital                                                                           | Comitato Etico - Ospedale Niguarda Ca' Granda                                                                                                                                    | 636-122015                                               | 23/12/2015                   |
| Latvia      | Riga        | Pauls Stradins Clinical University Hospital                                                 | Ethics Committee for Clinical Research at Pauls Stradins Clinical University Hospital Development Society                                                                        | 171215-1E                                                | 17/12/2015                   |
| Latvia      | Riga        | Riga Eastern Clinical University Hospital                                                   | Ethics Committee for Clinical Research at Pauls Stradins Clinical University Hospital Development Society                                                                        | 171215-1E                                                | 17/12/2015                   |
| Latvia      | Rezekne     | Rezekne Hospital                                                                            | Ethics Committee for Clinical Research at Pauls Stradins Clinical University Hospital Development Society                                                                        | 171215-1E                                                | 17/12/2015                   |
| Lithuania   | Vilnius     | Vilniaus Universiteto Ligonine                                                              | VILNIAUS REGIONINIS BIOMEDICININIŲ TYRIMŲ ETIKOS KOMITETAS                                                                                                                       | 158200-15-801-323                                        | 6/10/2015                    |
| Lithuania   | Kaunas      | LSMUL Kauno klinikos Skubio pagalbos skyrius                                                | KAUNO REGIONINIS BIOMEDICININIŲ TYRIMŲ ETIKOS KOMITETAS                                                                                                                          | BE-2-6                                                   | 6/01/2015                    |
| Netherlands | Leiden      | Het Leids Universitair Medisch Centrum te Leiden                                            | Leids Universitair Centrum - Commissie Medische Ethiek                                                                                                                           | P14.222/NV/nv                                            | 3/12/2014                    |
| Netherlands | Rotterdam   | Erasmus MC                                                                                  | Leids Universitair Centrum - Commissie Medische Ethiek                                                                                                                           | P14.222/NV/nv                                            | 3/12/2014                    |
| Netherlands | The Hague   | Medisch Centrum Haaglanden                                                                  | Leids Universitair Centrum - Commissie Medische Ethiek                                                                                                                           | P14.222/NV/nv                                            | 3/12/2014                    |
| Netherlands | The Hague   | Het Haga Hospital                                                                           | Leids Universitair Centrum - Commissie Medische Ethiek                                                                                                                           | P14.222/NV/nv                                            | 25/11/2015                   |
| Netherlands | Nijmegen    | Radboud UMC                                                                                 | Leids Universitair Centrum - Commissie Medische Ethiek                                                                                                                           | P14.222/NV/nv                                            | 2/07/2015                    |
| Netherlands | Tilburg     | St. Elisabeth Ziekenhuis                                                                    | Leids Universitair Centrum - Commissie Medische Ethiek                                                                                                                           | P14.222/NV/nv                                            | 2/07/2015                    |
| Netherlands | Groningen   | UMC Groningen                                                                               | Leids Universitair Centrum - Commissie Medische Ethiek                                                                                                                           | P14.222/NV/nv                                            | 3/12/2014                    |
| Norway      | Tromsø      | Universitetssykehuset Nord-Norge                                                            | Regional komité for medisinsk og helsefaglig forskningsetikk REK midt-Norge (REK midt)                                                                                           | 2014/1454                                                | 23/03/2015                   |
| Norway      | Trondheim   | St.Olavs Hospital                                                                           | Regional komité for medisinsk og helsefaglig forskningsetikk REK midt-Norge (REK midt)                                                                                           | 2014/1454                                                | 23/03/2015                   |
| Norway      | Oslo        | Oslo Universitetssykehus                                                                    | Regional komité for medisinsk og helsefaglig forskningsetikk REK midt-Norge (REK midt)                                                                                           | 2014/1454                                                | 23/03/2015                   |
| Romania     | Timisoara   | Clinica de Neurochirurgie<br>Universitatea de Medicina si Farmacie "Victor Babes" Timisoara | Comitetului de Etica a Spitalului Clinic Judetean de Urgenta Timisoara                                                                                                           | 73                                                       | 16/10/2014                   |
| Serbia      | Novi Sad    | Klinickog centra Vojvodine                                                                  | Etidkog odbora Klinickog centra Vojvodine                                                                                                                                        | 00-08/332                                                | 11/07/2014                   |
| Spain       | Madrid      | Hospital Universitario 12 de Octubre                                                        | Comité Etico de Investigación Clínica del Hospital Universitario 12 de Octubre                                                                                                   | 14/262                                                   | 3/11/2014                    |
| Spain       | Barcelona   | Vall d'Hebron University Hospital                                                           | Comité ético de investigación clínica y comisión de proyectos de investigación del hospital universitari Vall d'Hebron                                                           | ID-RTF080                                                | 13/11/2014                   |

|                    |             |                                                    |                                                                                                         |                               |                              |
|--------------------|-------------|----------------------------------------------------|---------------------------------------------------------------------------------------------------------|-------------------------------|------------------------------|
| <b>Spain</b>       | Bilbao      | Clínico Universitario de Cruces                    | Comité Etico de Investigacion Clinica de Euskadi                                                        | PI2014158                     | 24/02/2015                   |
| <b>Spain</b>       | Valencia    | Clínico Universitario de Valencia                  | Comité Etico de Investigacion Clinica del Clínico Universitario de Valencia                             | F-CE-GEva-15                  | 23/04/2015                   |
| <b>Sweden</b>      | Stockholm   | Karolinska University Hospital                     | EPN (Regionala Etikprövningsnämnden i Stockholm)                                                        | 2014/1473-31/4                | 24/09/2014                   |
| <b>Sweden</b>      | Umea        | Umea University Hospital                           | EPN (Regionala Etikprövningsnämnden i Stockholm)                                                        | 2014/1473-31/4                | 24/09/2014                   |
| <b>Switzerland</b> | Lausanne    | Centre hospitalier universitaire Vaudois           | La Commission cantonale (VD) d'éthique de la recherche sur l'être humain (CER-VD)                       | 473/11                        | 9/12/2014                    |
| <b>UK</b>          | Birmingham  | Queen Elizabeth Hospital                           | - NHS HRA<br>- UHB Research Governance Office - Queen Elizabeth Hospital                                | - 14/SC/1370<br>- RRS224      | - 22/12/2014<br>- 24/02/2016 |
| <b>UK</b>          | Cambridge   | Cambridge University Hospital NHS Foundation Trust | - NHS HRA<br>- Research and Development Department - Cambridge University Hospital NHS Foundation Trust | - 14/SC/1370<br>- AO93184     | - 22/12/2014<br>- 30/01/2015 |
| <b>UK</b>          | Southampton | University Hospitals Southampton NHS Trust         | - NHS HRA<br>- Research Governance Office - University Hospitals Southampton NHS Trust                  | - 14/SC/1370<br>- RHM CRI0294 | - 22/12/2014<br>- 13/03/2015 |
| <b>UK</b>          | Sheffield   | Sheffield Teaching Hospitals NHS Foundation Trust  | - NHS HRA<br>- Research and Development Department -Sheffield Teaching Hospitals NHS Foundation Trust   | - 14/SC/1370<br>- STH18187    | - 22/12/2014<br>- 25/03/2015 |
| <b>UK</b>          | London      | Kings college London                               | - NHS HRA<br>- Research & Innovation Office - Kings college London NHS Foundation Trust                 | - 14/SC/1370<br>- KCH15-204   | - 22/12/2014<br>- 30/12/2015 |
| <b>UK</b>          | Salford     | Salford Royal Hospital                             | - NHS HRA<br>- Research and Development Department -Salford Royal Hospital NHS Foundation Trust         | - 14/SC/1370<br>- 2015/025ET  | - 22/12/2014<br>- 27/07/2015 |
| <b>UK</b>          | Liverpool   | The Walton centre NHS Foundation Trust             | - NHS HRA<br>- Research & Innovation Office - The Walton centre NHS Foundation Trust                    | - 14/SC/1370<br>- RG154-15    | - 22/12/2014<br>- 11/05/2015 |
| <b>UK</b>          | Bristol     | Southmead Hospital Bristol                         | - NHS HRA<br>- Research & Innovation - North Bristol NHS Trust                                          | - 14/SC/1370<br>- 3427        | - 22/12/2014<br>- 23/12/2014 |
| <b>UK/Scotland</b> | Edinburgh   | Lothian Health Board                               | - NHS Scotland<br>- Research and Development Department - University Hospitals Division NHS Lothian     | - 14/SS/1086<br>- 2015/0171   | - 23/12/2014<br>- 19/06/2015 |
